# Supplementary material for: Metabolomic Diversity and Identification of Antibacterial Activities of Bacteria Isolated From Marine Sediments in Hawai’i and Puerto Rico
Source: PubMed Central journal article supplement (PMC7052060; doi:10.3389/fmolb.2020.00023), 2020-02-25
Supplement: Data_Sheet_1.pdf [file Data_Sheet_1.pdf]

**Table S8.** Probable identification of the metabolites selected from the dataset based on VIP scores derived from the PCA and PLS-DA analysis and annotated after METLIN searches.

| Rt (min) | m/z      | Molecular formula                                                                                                 | Possible adducts                                                                         | Most probable Metlin match                |
|----------|----------|-------------------------------------------------------------------------------------------------------------------|------------------------------------------------------------------------------------------|-------------------------------------------|
| 1.41     | 261.1243 | C14H18N2O4<br>C17H19NaO2<br>C14H16N2O3<br>C17H17NaO<br>C17H18O<br>C13H12N2O2<br>C16H13Na<br>C14H22O2<br>C12H13NO3 | M+H-H2O<br>M+H-H2O<br>M+H<br>M+H<br>M+Na<br>M+CH3OH+H<br>M+CH3OH+H<br>M+K<br>M+ACN+H     | C14H18N2O4<br>[M+H-H2O]                   |
| 1.57     | 147.0556 | C8H8N2O2<br>C8H6N2O<br>C7H2N2                                                                                     | M+H-H2O<br>M+H<br>M+CH3OH+H                                                              | C8H8N2O2<br>[M+H-H2O]                     |
| 1.98     | 201.1032 | C12H14N2O2<br>C15H15Na<br>C12H12N2O<br>C12H18                                                                     | M+H-H2O<br>M+H-H2O<br>M+H<br>M+K                                                         | C12H12N2O<br>[M+H]                        |
| 2.27     | 197.1084 | C8H19N2NaOS<br>C8H17N2NaS<br>C8H18N2S                                                                             | M+H-H2O<br>M+H<br>M+Na                                                                   | C8H18N2S<br>[M+Na]<br>C10H13FN2O<br>[M+H] |
| 2.46     | 201.0679 | C14H11NaO<br>C14H9Na<br>C14H10                                                                                    | M+H-H2O<br>M+H<br>M+Na                                                                   | C10H13ClO2<br>[M+H]                       |
| 3.46     | 560.3941 | C32H50N5NaO2<br>C32H49NO5<br>C33H45N5O<br>C30H50NNaO5<br>C31H46N5NaO<br>C31H50O6<br>C32H46N4O2<br>C30H47N4NaO2    | M+H<br>M+CH3OH+H<br>M+CH3OH+H<br>M+CH3OH+H<br>M+CH3OH+H<br>M+ACN+H<br>M+ACN+H<br>M+ACN+H | C33H53NO6<br>CAS: 511-36-4<br>[M+H]       |
| 5.16     | 479.2703 | C26H41NO5S<br>C24H42NNaO5S<br>C21H38N5NaO6<br>C25H38N5NaOS                                                        | M+H-H2O, M+H<br>M+H-H2O, M+H<br>M+H-H2O, M+H<br>M+H-H2O, M+H                             | C19H36N8O5<br>[M+Na]                      |
| 5.16     | 515.2924 | C22H45NO12                                                                                                        | M+H-H2O<br>M+H<br>M+Na                                                                   | C21H38N8O7<br>[M+H]                       |
| 5.16     | 554.2464 | C23H41NO15<br>C24H37N5O11<br>C21H41N5O11S                                                                         | M+H-H2O<br>M+H-H2O<br>M+H-H2O                                                            | C24H35N5O10<br>[M+H]                      |

|      |          |                                                                                                                                                                                                                                                                                                                                                           |                                                                                                                                                                                                                               |                                       |
|------|----------|-----------------------------------------------------------------------------------------------------------------------------------------------------------------------------------------------------------------------------------------------------------------------------------------------------------------------------------------------------------|-------------------------------------------------------------------------------------------------------------------------------------------------------------------------------------------------------------------------------|---------------------------------------|
|      |          | C19H42N5NaO11S<br>C23H39NO14<br>C20H43NO14S<br>C24H35N5O10<br>C21H39N5O10S<br>C19H40N5NaO10S<br>C19H41N5O10S<br>C22H42N3NaO8S<br>C22H35NO13<br>C19H39NO13S<br>C23H31N5O9<br>C20H35N5O9S<br>C18H36N5NaO9S<br>C24H41N3O9<br>C20H45N5O6S2<br>C22H42N3NaO9<br>C22H32N4O10<br>C25H33N2NaO8<br>C17H37N4NaO10S<br>C21H37N4NaO5S2<br>C22H43N3O8S<br>C20H44N3NaO8S | M+H-H2O<br>M+H<br>M+H<br>M+H<br>M+H<br>M+H<br>M+Na<br>M+Na<br>M+CH3OH+H<br>M+CH3OH+H<br>M+CH3OH+H<br>M+CH3OH+H<br>M+CH3OH+H<br>M+K<br>M+K<br>M+K<br>M+ACN+H<br>M+ACN+H<br>M+ACN+H<br>M+ACN+H<br>M+ACN+H<br>M+2Na-H<br>M+2Na-H |                                       |
| 5.39 | 398.3423 | C27H45NO2<br>C27H43NO<br>C26H39N<br>C21H44NNaS<br>C25H40O                                                                                                                                                                                                                                                                                                 | M+H-H2O<br>M+H<br>M+CH3OH+H<br>M+CH3OH+H<br>M+ACN+H                                                                                                                                                                           | C27H43NO<br>CAS: 80-78-4              |
| 5.99 | 430.2957 | C26H41NO5<br>C27H37N5O<br>C25H38N5NaO<br>C22H42N5NaOS<br>C26H39NO4<br>C27H35N5<br>C25H36N5Na<br>C22H40N5NaS<br>C25H37N5<br>C22H41N5S<br>C25H35NO3<br>C22H41N5O<br>C24H36O4<br>C25H32N4<br>C23H33N4Na                                                                                                                                                      | M+H-H2O<br>M+H-H2O<br>M+H-H2O<br>M+H-H2O<br>M+H<br>M+H<br>M+H<br>M+H<br>M+Na<br>M+Na<br>M+CH3OH+H<br>M+K<br>M+ACN+H<br>M+ACN+H<br>M+ACN+H                                                                                     | C26H39NO4<br>C27H35N5<br>[M+H]        |
| 5.99 | 465.3098 | C26H43NO6<br>C27H39N5O2                                                                                                                                                                                                                                                                                                                                   | M+H-H2O, M+H, M+Na<br>M+H-H2O, M+H, M+Na                                                                                                                                                                                      | C29H40N2O3<br>CAS: 112648-68-7, [M+H] |

|       |          |                                                                                                                                                     |                                                                                                              |                                         |
|-------|----------|-----------------------------------------------------------------------------------------------------------------------------------------------------|--------------------------------------------------------------------------------------------------------------|-----------------------------------------|
|       |          | C25H40N5NaO2<br>C22H44N5NaO2S                                                                                                                       | M+H-H2O, M+H, M+Na<br>M+H-H2O, M+H, M+Na                                                                     | C27H42N2O3<br>[M+Na]                    |
| 5.99  | 337.2531 | C24H34O2<br>C24H32O<br>C23H28                                                                                                                       | M+H-H2O<br>M+H<br>M+CH3OH+H                                                                                  | C24H32O<br>[M+H]                        |
| 6.14  | 352.2404 | C24H32O2                                                                                                                                            | M+H-H2O<br>M+H                                                                                               | C21H34ClNO<br>[M+H]                     |
| 6.93  | 223.1177 | C7H17N3O5<br>C10H18NNaO3                                                                                                                            | M+H-H2O<br>M+H<br>M+H-H2O<br>M+H                                                                             | C9H18O6<br>CAS: 5391-17-3<br>[M+H]      |
| 6.93  | 372.2679 | C24H36O3                                                                                                                                            | M+H-H2O<br>M+H                                                                                               | C22H36FNO<br>CAS: 166100-37-4<br>[M+Na] |
| 6.95  | 426.3213 | C24H45NO6<br>C23H42N5NaO2<br>C24H43NO5<br>C23H40N5NaO<br>C23H41N5O<br>C23H39NO4<br>C24H35N5<br>C22H36N5Na<br>C23H46N3Na<br>C23H36N4O<br>C21H37N4NaO | M+H-H2O<br>M+H-H2O<br>M+H<br>M+H<br>M+Na<br>M+CH3OH+H<br>M+CH3OH+H<br>M+CH3OH+H<br>M+K<br>M+ACN+H<br>M+ACN+H | C22H45NO5<br>[M+Na]                     |
| 7.09  | 456.3072 | C25H44O7<br>C23H45NaO7<br>C24H41N4NaO3                                                                                                              | M+H-H2O, M+Na<br>M+H-H2O, M+Na<br>M+H-H2O, M+Na                                                              | C26H43NO4<br>[M+Na]                     |
| 7.28  | 470.2908 | C18H42N5NaO6<br>C18H43N5O6                                                                                                                          | M+Na<br>M+2Na-H                                                                                              | C26H42ClN3O<br>[M+Na]                   |
| 10.79 | 677.2932 | C32H47N4NaO8<br>C31H41NO13<br>C30H38N5NaO9<br>C26H49N4NaO12                                                                                         | M+K<br>M+ACN+H<br>M+ACN+H<br>M+2Na-H                                                                         | C29H46N6O9S<br>[M+Na]                   |

Note: Metabolites generated from the VIP list (a statistically generated list) have a confidence level of >95%. Most probable Metlin match was determined using *m/z* values, retention time, precursor ion, fragmentation patterns, and mass error. These are probable identifications. Additional potential metabolites that differ from those in this list by standard adducts (e.g. Na-H) are not included.
